# Supplementary material
Source: publisher figshare collection journal article supplement (https://acs.figshare.com/ndownloader/files/13239131)
Supplement: Supplementary file 1 [file 13239131]

## Supporting Information for

### **KA-11, a novel pyrrolidine-2,5-dione derived broad-spectrum anticonvulsant: its antiepileptogenic, antinociceptive properties and *in vitro* characterization**

Katarzyna Socała,<sup>\*,†</sup> Szczepan Mogilski,<sup>‡</sup> Mateusz Pieróg,<sup>†</sup> Dorota Nieoczym,<sup>†</sup> Michał Abram,<sup>§</sup> Bartłomiej Szulczyk,<sup>||,⊥</sup> Annamaria Lubelska,<sup>∇</sup> Gniewomir Latacz,<sup>∇</sup> Urszula Doboszewska,<sup>†</sup> Piotr Wlaź,<sup>†</sup> and Krzysztof Kamiński<sup>§</sup>

<sup>†</sup>Department of Animal Physiology, Institute of Biology and Biochemistry, Faculty of Biology and Biotechnology, Maria Curie-Skłodowska University, Akademicka 19, 20-033 Lublin, Poland. <sup>‡</sup>Department of Pharmacodynamics, Faculty of Pharmacy, Jagiellonian University Medical College, Medyczna 9, 30-688 Kraków, Poland. <sup>§</sup>Department of Medicinal Chemistry, Faculty of Pharmacy, Jagiellonian University Medical College, Medyczna 9, 30-688 Kraków, Poland. <sup>||</sup>Department of Drug Technology and Pharmaceutical Biotechnology, Medical University of Warsaw, Banacha 1, 02-097 Warsaw, Poland. <sup>⊥</sup>Department of Physiology and Pathophysiology, Medical University of Warsaw, Banacha 1B, 02-097 Warsaw, Poland. <sup>∇</sup>Department of Technology and Biotechnology of Drugs, Faculty of Pharmacy, Jagiellonian University Medical College, Medyczna 9, 30-688 Kraków, Poland.

#### **Table of contents:**

|                                                                                                                                                                                                                              |    |
|------------------------------------------------------------------------------------------------------------------------------------------------------------------------------------------------------------------------------|----|
| <b>Figure S1.</b> Effect of repeated pretreatment with <b>KA-11</b> on the percentage of the open arms entries and the percentage of the time spent in the open arms in the elevated plus maze test in PTZ-kindled mice..... | S2 |
| <b>Figure S2.</b> Effect of repeated pretreatment with <b>KA-11</b> on spontaneous locomotor activity in PTZ-kindled mice.....                                                                                               | S3 |
| <b>Figure S3.</b> Effect of acute pretreatment with <b>KA-11</b> on motor coordination in the rotarod test in mice.....                                                                                                      | S4 |

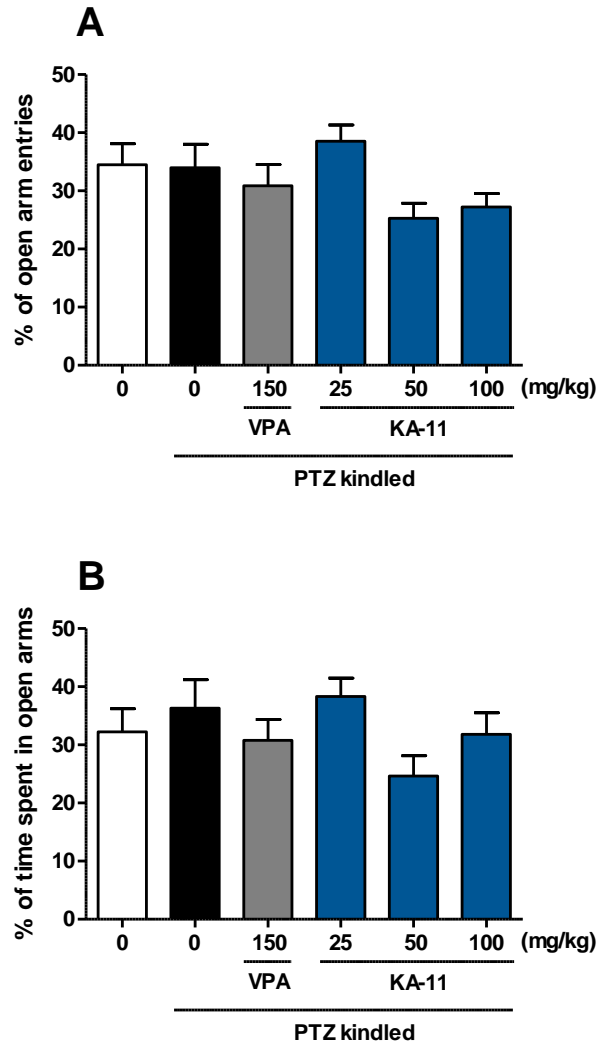

**Figure S1.** Effect of repeated pretreatment with **KA-11** on the percentage of the open arms entries (panel A) and the percentage of the time spent in the open arms (panel B) in the elevated plus maze test in PTZ-kindled mice. **KA-11** and VPA were injected *ip* once daily for 33 days. PTZ (40 mg/kg, *ip*) was injected every 48 h (in total 17 injections). Statistical analysis: one-way ANOVA. Data are expressed as means  $\pm$  SEM.  $n = 12$ – $15$  animals per group

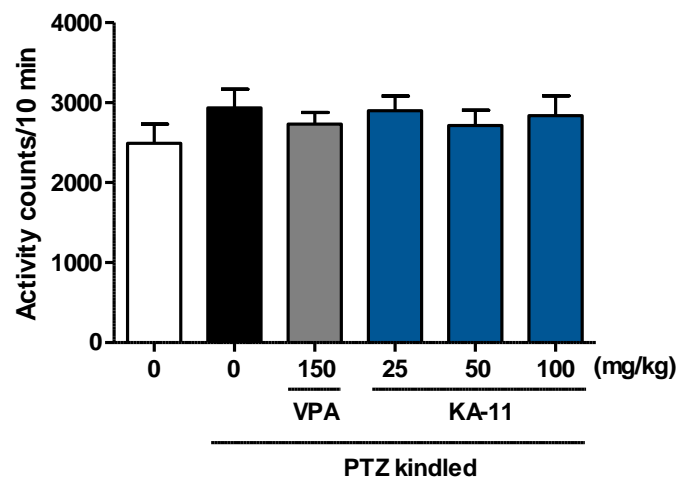

**Figure S2.** Effect of repeated pretreatment with **KA-11** on spontaneous locomotor activity in PTZ-kindled mice. **KA-11** and VPA were injected *ip* once daily for 33 days. PTZ (40 mg/kg, *ip*) was injected every 48 h (in total 17 injections). Statistical analysis: one-way ANOVA. Data are expressed as means  $\pm$  SEM.  $n = 12$ – $15$  animals per group

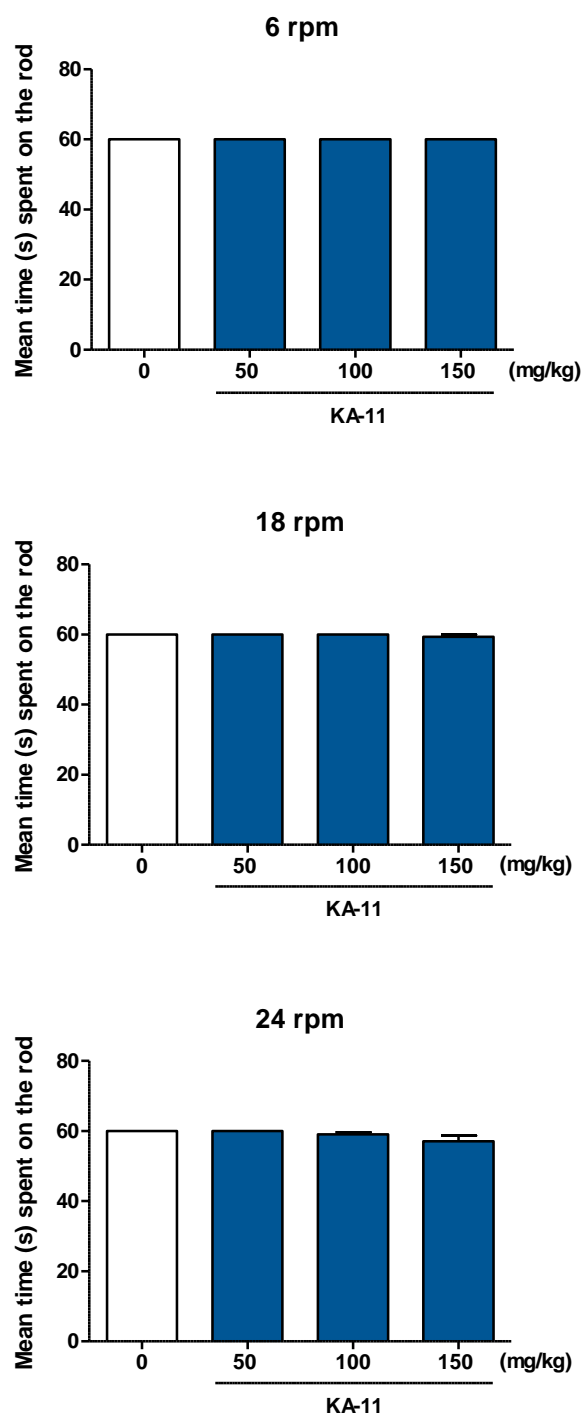

**Figure S3.** Effect of acute pretreatment with **KA-11** on motor coordination in the rotarod test in mice. **KA-11** was injected *ip* 30 min before the test. Statistical analysis: one-way ANOVA. Data are expressed as means  $\pm$  SEM.  $n = 8$ –10 animals per group
